# Supplementary material for: HERC1 deficiency causes osteopenia through transcriptional program dysregulation during bone remodeling
Source: PubMed Central journal article supplement (PMC9837143; doi:10.1038/s41419-023-05549-x), 2023-01-12
Supplement: 41419_2023_5549_MOESM2_ESM.pdf [file 41419_2023_5549_MOESM2_ESM.pdf]

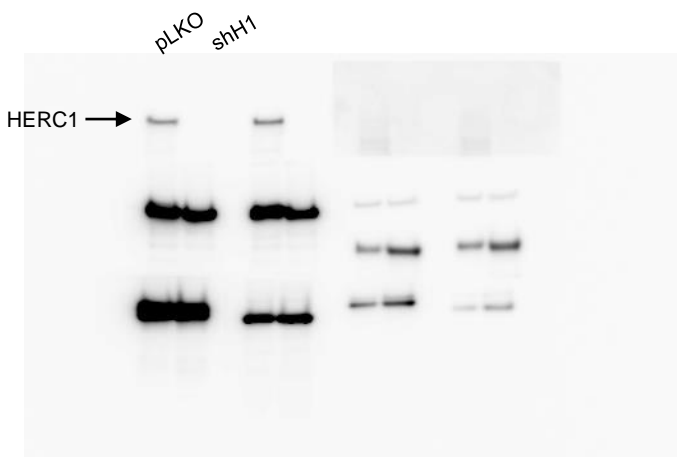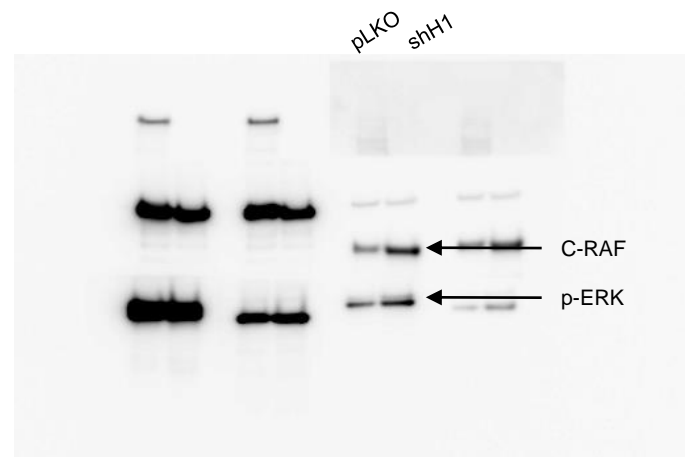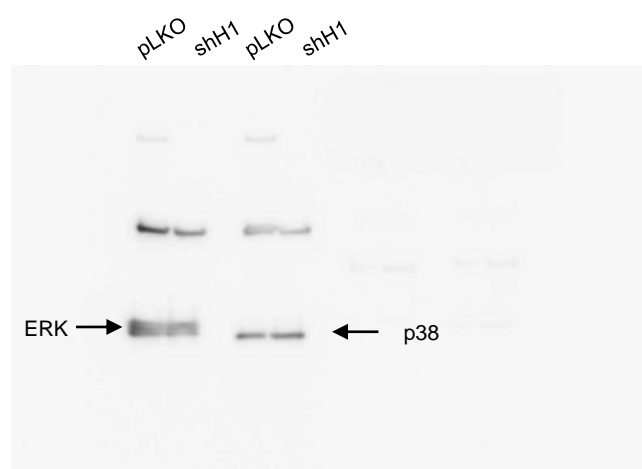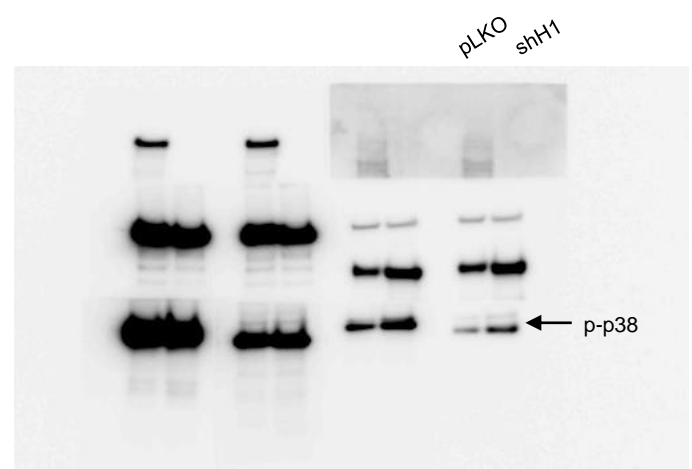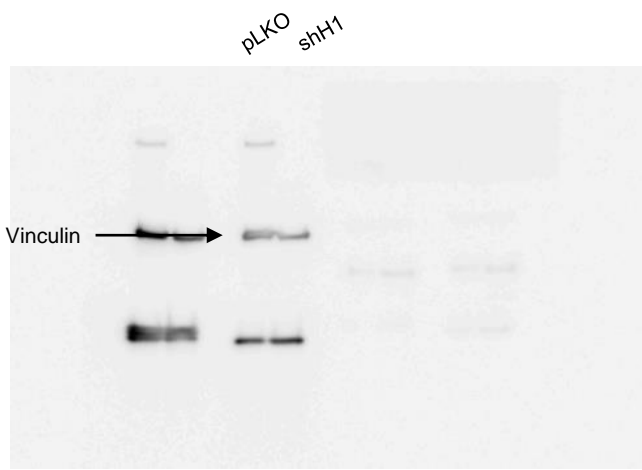

Uncropped Western Blot Figure 1A

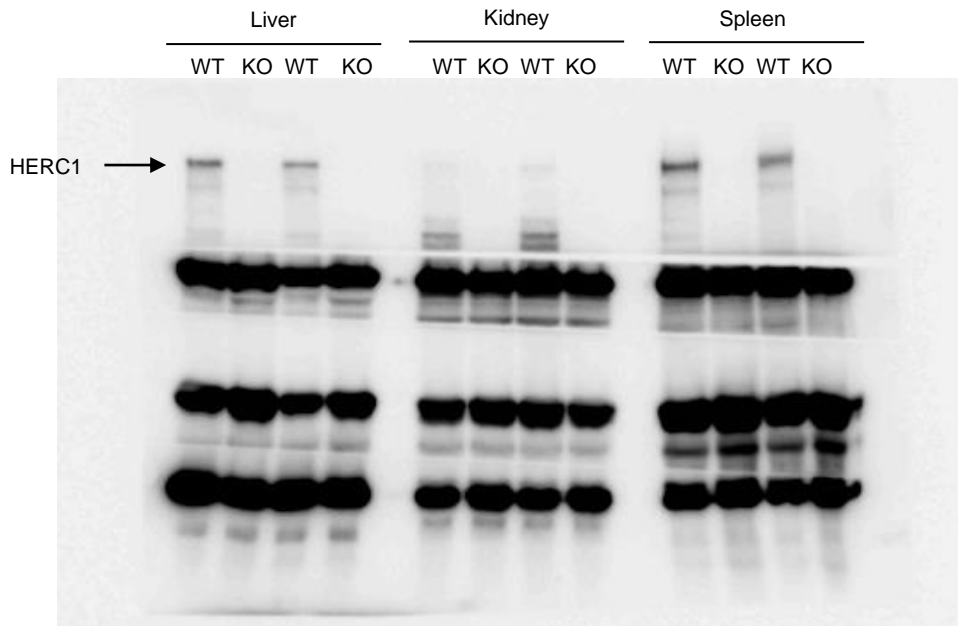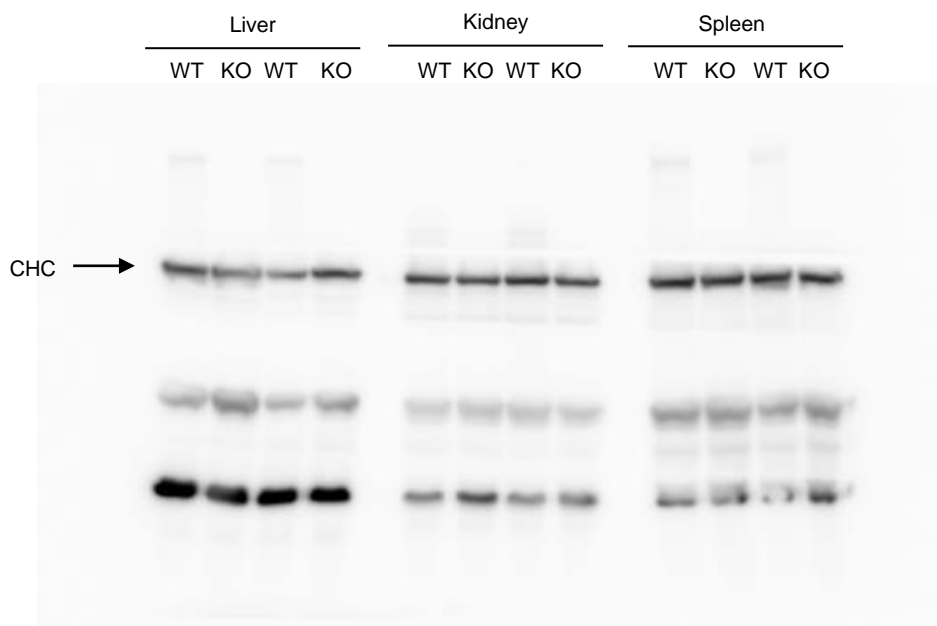

**Uncropped Western Blot Figure 2C**

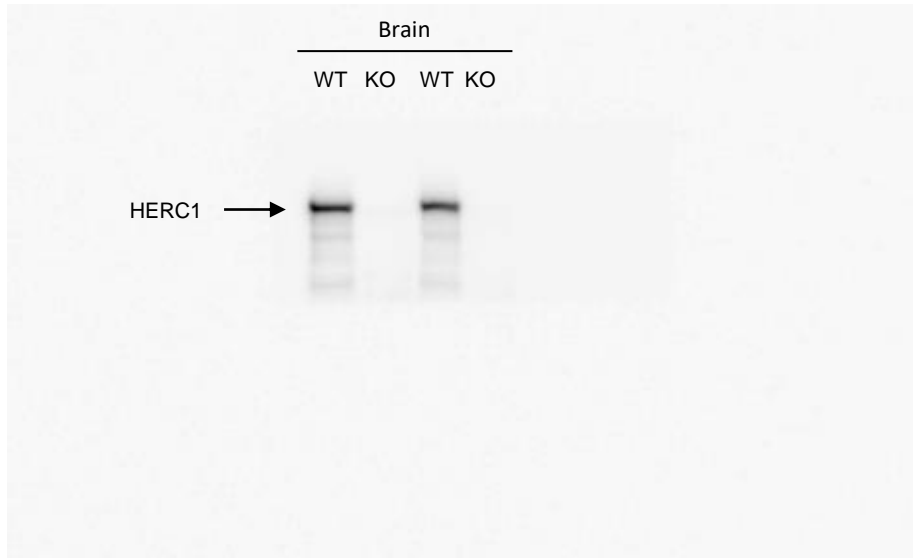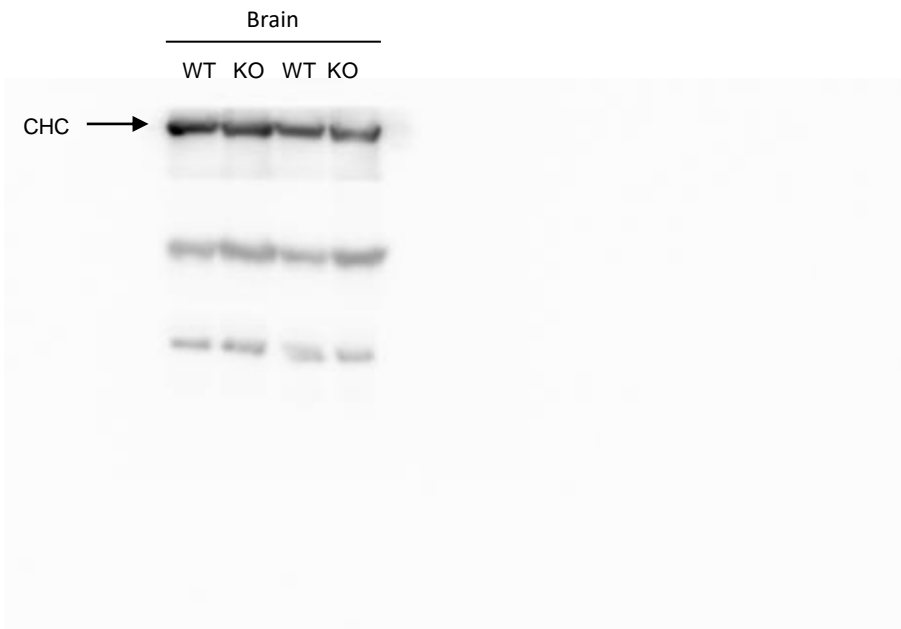

**Uncropped Western Blot Figure 2C**
